# Supplementary material for: Daiokanzoto (Da-Huang-Gan-Cao-Tang) is an effective laxative in gut microbiota associated with constipation
Source: PubMed Central journal article supplement (PMC6405880; doi:10.1038/s41598-019-40278-2), 2019-03-07
Supplement: 41598_2019_40278_MOESM1_ESM.pdf [file 41598_2019_40278_MOESM1_ESM.pdf]

# Daiokanzoto (Da-Huang-Gan-Cao-Tang) is an effective laxative in gut microbiota associated with constipation

Kento Takayama\*, Chiho Takahara, Norihiko Tabuchi, and Nobuyuki Okamura

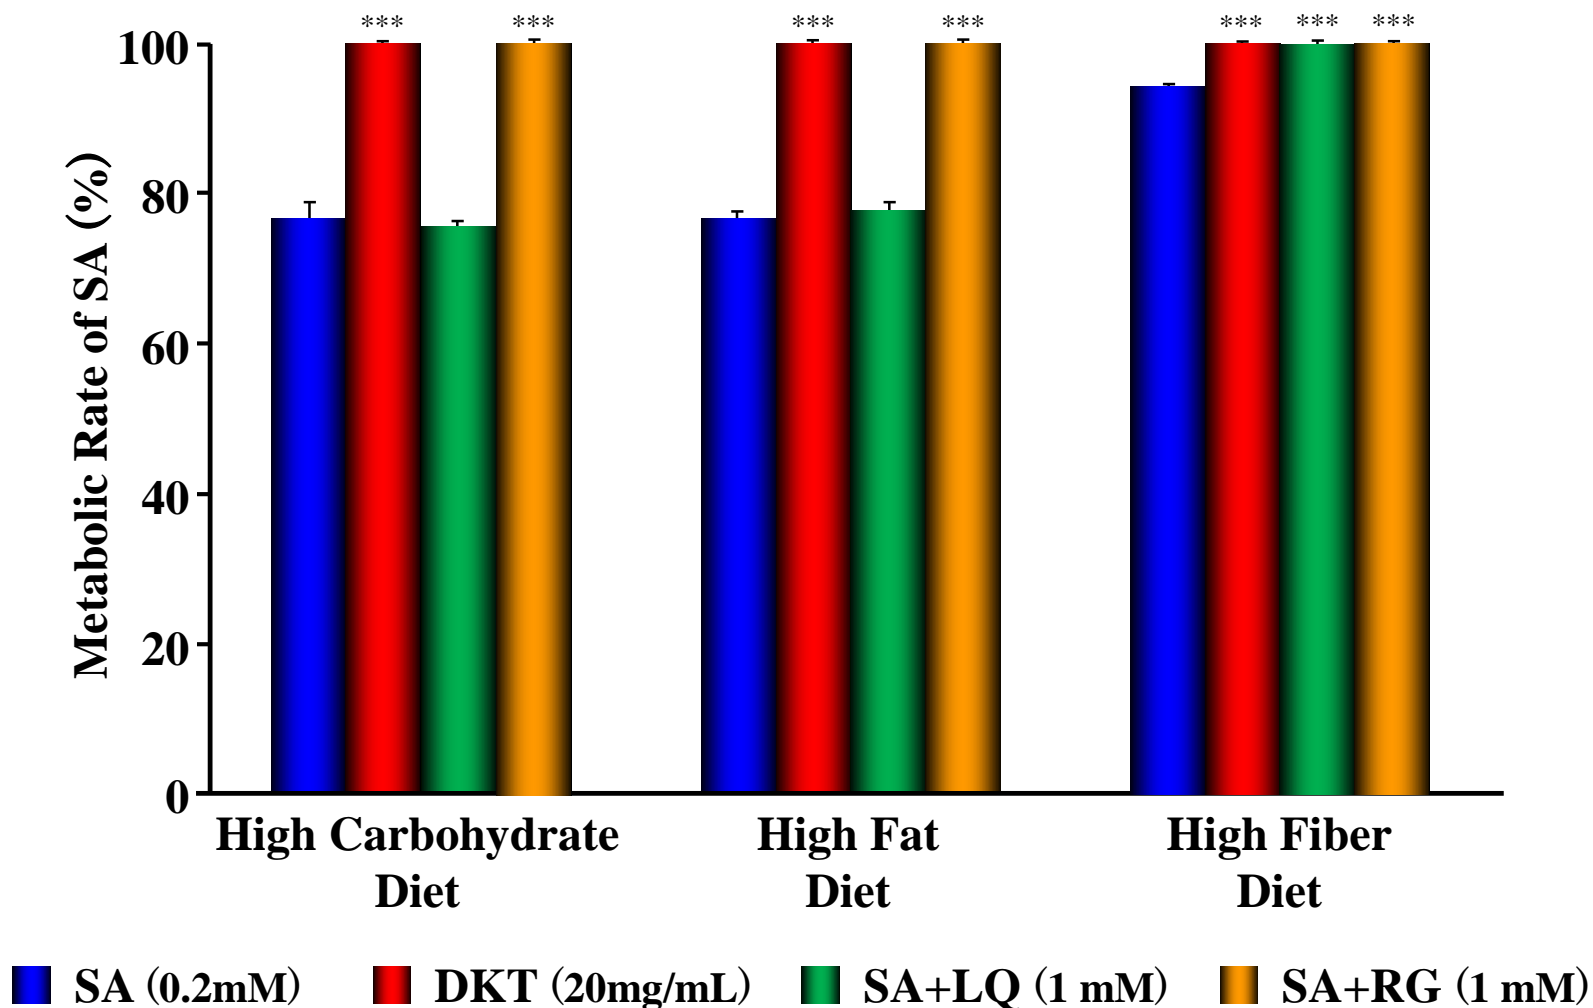

Supplementary Figure S1. Metabolic activity of anthranoid laxatives.

Values are presented as the mean  $\pm$  standard deviation (SD) of three samples. \*\*\* $p < 0.001$ , a statistically significant difference in relation to sennoside A (SA) using Dunnett's test.
