# Supplementary material for: Daiokanzoto (Da-Huang-Gan-Cao-Tang) is an effective laxative in gut microbiota associated with constipation
Source: PubMed Central journal article supplement (PMC6405880; doi:10.1038/s41598-019-40278-2), 2019-03-07
Supplement: 41598_2019_40278_MOESM2_ESM.pdf [file 41598_2019_40278_MOESM2_ESM.pdf]

# Daiokanzoto (Da-Huang-Gan-Cao-Tang) is an effective laxative in gut microbiota associated with constipation

Kento Takayama\*, Chiho Takahara, Norihiko Tabuchi, and Nobuyuki Okamura

## Supplementary Table S1. Composition of diets

| Product             | High-Carbohydrate<br>(Normal Diet, D12450H) |       | High-Fat<br>(D12451) |       | High-Fiber<br>(D14053101) |       |
|---------------------|---------------------------------------------|-------|----------------------|-------|---------------------------|-------|
|                     | gm%                                         | kcal% | gm%                  | kcal% | gm%                       | kcal% |
| <b>Carbohydrate</b> |                                             |       |                      |       |                           |       |
| Corn Starch         | 452.2                                       | 1809  | 72.8                 | 291   | 452.2                     | 1809  |
| Maltodextrin 10     | 75                                          | 300   | 100                  | 400   | 75                        | 300   |
| Sucrose             | 172.8                                       | 691   | 172.8                | 691   | 172.8                     | 691   |
| <b>Fat</b>          |                                             |       |                      |       |                           |       |
| Soybean Oil         | 25                                          | 225   | 25                   | 225   | 25                        | 225   |
| Lard                | 20                                          | 180   | 177.5                | 1598  | 20                        | 180   |
| <b>Fiber</b>        |                                             |       |                      |       |                           |       |
| Cellulose, BW200    | 50                                          | 0     | 50                   | 0     | 50                        | 0     |
| Inulin              | 0                                           | 0     | 0                    | 0     | 117                       | 117   |
